# Supplementary material for: Health behaviours and telomere length in severe mental disorders
Source: Research Square preprint supplement (doi:10.21203/rs.3.rs-7877606/v1), 2025-11-18
Supplement: Supplementary file 1 [file 336d9040b08f3a9be07c855b.docx]

**Supplementary Materials**

**Table S1.** Health behaviour distribution between diagnostic groups

| Number of Health Behaviours | Schizophrenia (*n* = 225) | Affective Disorders (*n* = 185) |
| --- | --- | --- |
| 0, N (%) | 17 (7.6) | 20 (10.8) |
| 1, N (%) | 52 (23.1) | 48 (25.9) |
| 2, N (%) | 58 (25.8) | 49 (26.5) |
| 3, N (%) | 58 (25.8) | 34 (18.4) |
| 4, N (%) | 31 (13.8) | 23 (12.4) |
| 5, N (%) | 9 (4.0) | 11 (6.1.) |

**Table S2.** Chi-square associations between health behaviours

| Behaviour 1 | Behaviour 2 | *χ2* | p-value |
| --- | --- | --- | --- |
| Tobacco use | Coffee Consumption | 15.68 | **< 0.001** |
| Tobacco use | Alcohol Use | 26.74 | **< 0.001** |
| Tobacco use | Substance Use | 31.63 | **< 0.001** |
| Tobacco use | Exercise | 1.56 | 0.21 |
| Tobacco use | Diet | 0.08 | 0.77 |
| Coffee Consumption | Alcohol Use | 1.93 | 0.16 |
| Coffee Consumption | Substance Use | 0.36 | 0.55 |
| Coffee Consumption | Exercise | 1.90 | 0.66 |
| Coffee Consumption | Diet | 0.02 | 0.88 |
| Alcohol Use | Substance Use | 23.56 | **< 0.001** |
| Alcohol Use | Exercise | 0.54 | 0.82 |
| Alcohol Use | Diet | 1.03 | 0.31 |
| Substance Use | Exercise | 3.85 | 0.05 |
| Substance Use | Diet | 7.23 | 0.007 |
| Exercise | Diet | 9.79 | **0.002** |

**Significance threshold adjusted for multiple corrections. New alpha threshold set to: p = 0.0033*

**Figure S1.** Sexual abuse and number of health behaviours

ANCOVA, F = 4.29, *p* = 0.04, adjusted for age, s
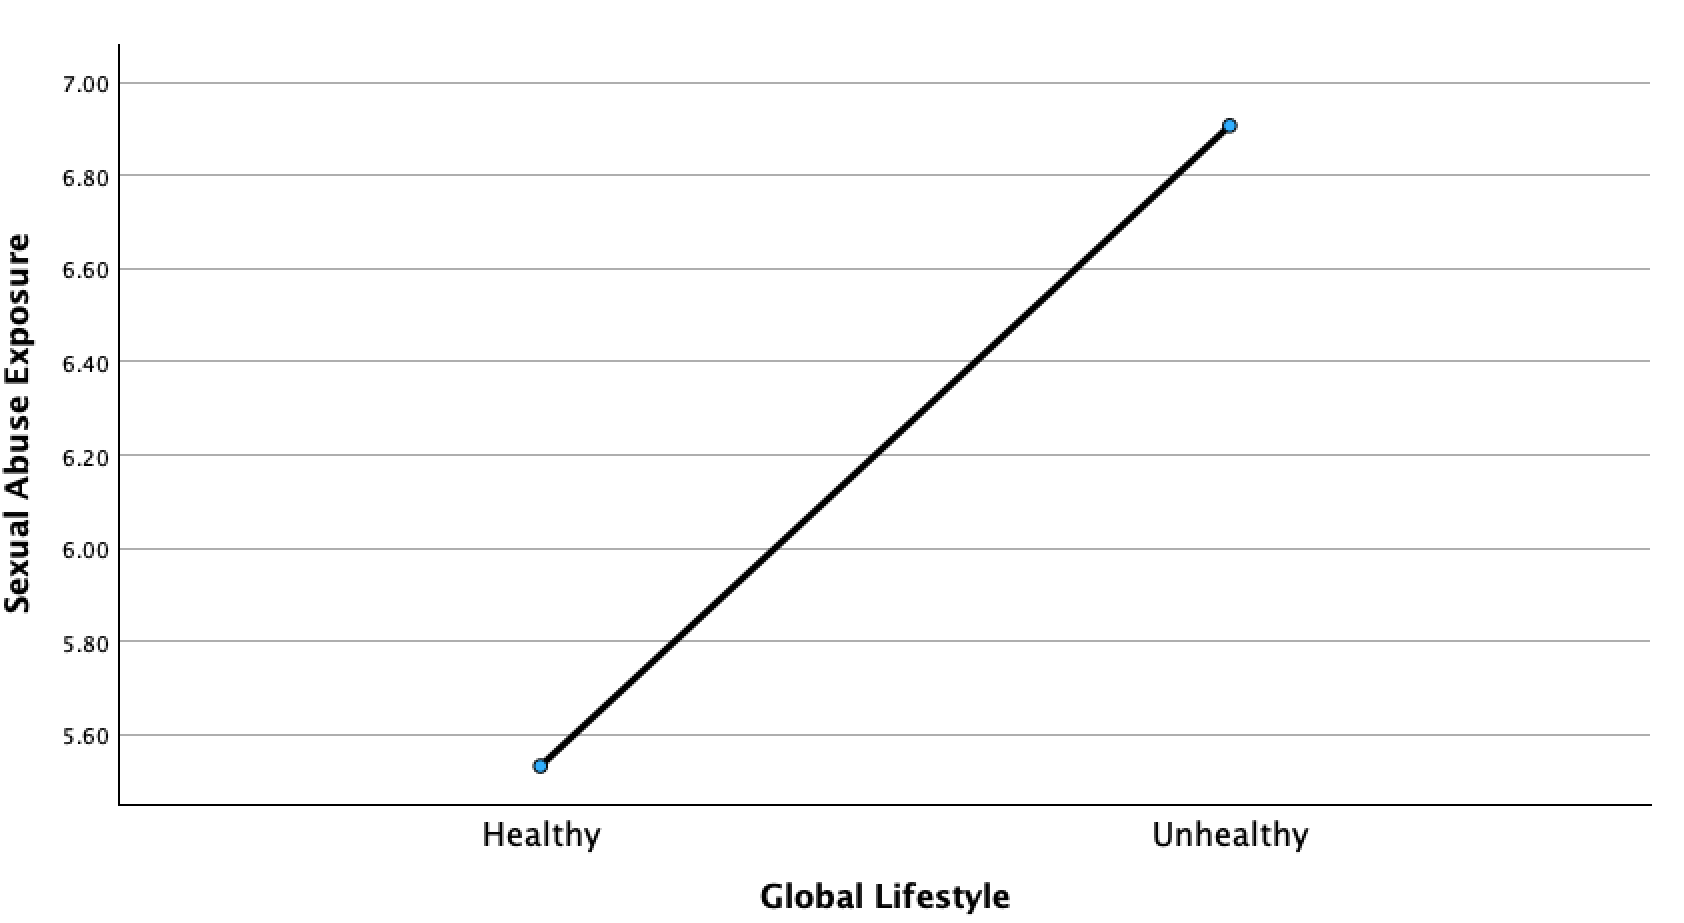
ex, and ethnicity. Patients with more severe sexual abuse history have unhealthier lifestyles.

**Figure S2**. Sexual abuse and number of health behaviours

ANCOVA, F = 3.15, p = 0.008, adjusted for age
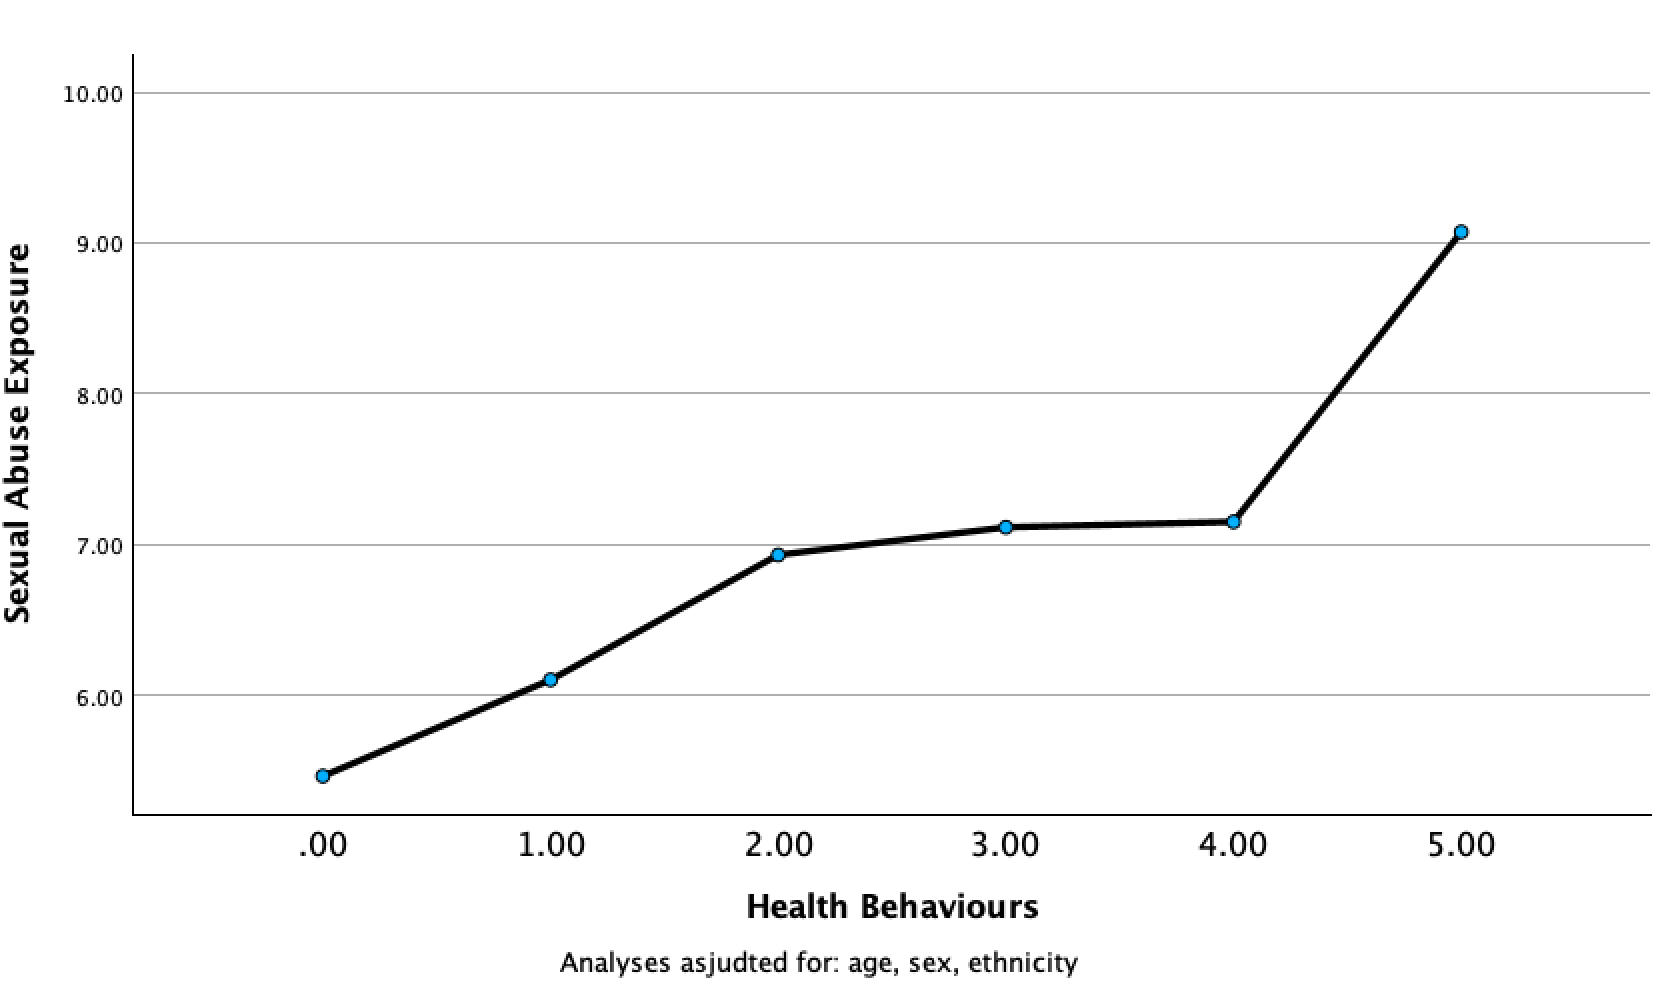
, sex, and ethnicity. Patients with more severe sexual abuse history have more unhealthy behaviours.
